# Supplementary material
Source: PubMed Central journal article supplement (PMC6472953)
Supplement: NIHMS1020937-supplement-1.pdf [file NIHMS1020937-supplement-1.pdf]

## Supplemental Materials

**Title:** Children's Exposure to SVOCs Mixtures: The TESIE Study

**Authors:** Kate Hoffman<sup>1</sup>, Stephanie M. Hammel<sup>1</sup>, Allison L. Phillips<sup>1</sup>, Amelia M. Lorenzo<sup>1</sup>, Albert Chen<sup>1</sup>, Antonia M. Calafat<sup>2</sup>, Xiaoyun Ye<sup>2</sup>, Thomas F. Webster<sup>3</sup>, and Heather M. Stapleton<sup>1, #</sup>

### **Affiliations:**

<sup>1</sup>Nicholas School of the Environment, Duke University, Durham, North Carolina, USA

<sup>2</sup>CDC

<sup>3</sup>Boston University School of Public Health, Boston University, Boston, Massachusetts, USA

**Email Addresses:** KH- kate.hoffman@duke.edu; SCH- stephanie.hammel@duke.edu; ALP- allison.l.phillips@duke.edu; AML- amelia.lorenzo@duke.edu; AC- chen.albert.y@gmail.com; AMC- aic7@cdc.gov; XY- xay5@cdc.gov; TFW- twebster@bu.edu; HMS- heather.stapleton@duke.edu

### **#Corresponding Author:**

Heather M. Stapleton, Ph.D.

Duke University, Nicholas School of the Environment

9 Circuit Drive, Box 90328

Durham, NC 27708

Phone: 919-613-8717

Email: heather.stapleton@duke.edu

### **Contents:**

Supplemental Table S1 - Selected demographic characteristics for children with available biospecimen in the TESIE Study.

Supplemental Table S2 - Estimated multiplicative change in biomarker concentration.

Supplemental Table S3 - Spearman correlations between biomarkers.

**Supplemental Table S1:** Selected demographic characteristics for children with available biospecimen in the TESIE Study.

| Characteristic                                                | TESIE   |           | TESIE with Urine |           | TESIE with Serum |           |
|---------------------------------------------------------------|---------|-----------|------------------|-----------|------------------|-----------|
|                                                               | n=203   |           | n=181            |           | n=90             |           |
|                                                               | N       | %         | N                | %         | N                | %         |
|                                                               | or mean | or range  | or mean          | or range  | or mean          | or range  |
| Child sex                                                     |         |           |                  |           |                  |           |
| male                                                          | 113     | 55.7%     | 99               | 54.7%     | 53               | 58.9%     |
| female                                                        | 90      | 44.3%     | 82               | 45.3%     | 37               | 41.1%     |
| Child age                                                     |         |           |                  |           |                  |           |
| months (mean and range)                                       | 53.9    | 38-73     | 53.9             | 38-73     | 53.7             | 38-73     |
| Maternal race/ethnicity                                       |         |           |                  |           |                  |           |
| non-Hispanic white                                            | 84      | 41.4%     | 75               | 41.4%     | 42               | 46.7%     |
| non-Hispanic black                                            | 75      | 36.9%     | 63               | 34.8%     | 37               | 41.1%     |
| Hispanic white                                                | 41      | 20.2%     | 40               | 22.1%     | 9                | 10.0%     |
| Other                                                         | 3       | 1.5%      | 3                | 1.7%      | 2                | 2.2%      |
| Maternal educational                                          |         |           |                  |           |                  |           |
| less than college graduate                                    | 113     | 55.7%     | 94               | 51.9%     | 47               | 52.2%     |
| college graduate or more                                      | 90      | 44.3%     | 87               | 48.1%     | 43               | 47.8%     |
| Average temperature during sample collection (mean and range) | 15.5    | -4.4-29.4 | 15.2             | -4.4-29.4 | 17.7             | -4.4-29.4 |
| Season during sample collection                               |         |           |                  |           |                  |           |
| winter                                                        | 53      | 26.1%     | 49               | 27.1%     | 19               | 21.1%     |
| spring                                                        | 45      | 22.2%     | 33               | 18.2%     | 21               | 23.3%     |
| summer                                                        | 34      | 16.7%     | 31               | 17.1%     | 23               | 25.6%     |
| fall                                                          | 71      | 35.0%     | 68               | 37.6%     | 27               | 30.0%     |

**Supplemental Table S2: Estimated multiplicative change in biomarker concentration.**

| Biomarker | Non-Hispanic Black  |        | Hispanic            |         | College Graduate    |        | Male Child          |      | Child Age (Months)  |       | Average Outdoor     |         |
|-----------|---------------------|--------|---------------------|---------|---------------------|--------|---------------------|------|---------------------|-------|---------------------|---------|
|           | 10 $\beta$ (95% CI) | p-     | 10 $\beta$ (95% CI) | p-value | 10 $\beta$ (95% CI) | p-     | 10 $\beta$ (95% CI) | p-   | 10 $\beta$ (95% CI) | p-    | 10 $\beta$ (95% CI) | p-value |
| BCIPP     | 1.46 (0.89, 2.38)   | 0.13   | 1.14 (0.64, 2.03)   | 0.65    | 1.66 (1.02, 2.70)   | 0.04   | 1.05 (0.72, 1.52)   | 0.90 | 0.98 (0.95, 1.01)   | 0.12  | 1.02 (0.99, 1.04)   | 0.16    |
| BCIPHIPP  | 1.30 (0.86, 1.95)   | 0.22   | 1.21 (0.65, 2.22)   | 0.55    | 0.68 (0.45, 1.02)   | 0.06   | 0.93 (0.69, 1.20)   | 0.54 | 1.02 (1.00, 1.04)   | 0.11  | 1.02 (1.00, 1.05)   | 0.02    |
| BDCIPP    | 1.35 (0.89, 2.04)   | 0.15   | 0.93 (0.53, 1.63)   | 0.79    | 1.24 (0.82, 1.89)   | 0.31   | 0.88 (0.44, 1.21)   | 0.64 | 1.00 (0.97, 1.02)   | 0.89  | 1.06 (1.04, 1.08)   | <0.0001 |
| DPHP      | 0.99 (0.63, 1.56)   | 0.96   | 0.67 (0.39, 1.15)   | 0.15    | 0.77 (0.49, 1.20)   | 0.25   | 0.88 (0.65, 1.18)   | 0.39 | 1.01 (0.99, 1.03)   | 0.33  | 1.01 (0.99, 1.03)   | 0.23    |
| ip-PPP    | 1.34 (0.90, 2.00)   | 0.15   | 1.15 (0.71, 1.85)   | 0.57    | 0.87 (0.59, 1.28)   | 0.48   | 1.10 (0.87, 1.39)   | 0.43 | 1.02 (1.00, 1.04)   | 0.05  | 1.02 (1.00, 1.04)   | 0.10    |
| tb-PPP    | 0.77 (0.48, 1.24)   | 0.29   | 0.55 (0.31, 1.00)   | 0.05    | 0.55 (0.35, 0.85)   | 0.01   | 1.12 (0.81, 1.56)   | 0.47 | 1.06 (1.02, 1.09)   | 0.001 | 1.02 (0.99, 1.04)   | 0.16    |
| 2,4-DCP   | 1.49 (0.92, 2.44)   | 0.11   | 1.53 (0.89, 2.63)   | 0.12    | 0.57 (0.36, 0.92)   | 0.02   | 1.12 (0.74, 1.69)   | 0.61 | 1.01 (0.97, 1.04)   | 0.76  | 1.01 (0.99, 1.04)   | 0.35    |
| 2,5-DCP   | 5.06 (2.29, 11.15)  | <.0001 | 3.82 (1.35, 10.85)  | 0.01    | 0.17 (0.08, 0.38)   | <.0001 | 1.36 (0.75, 2.50)   | 0.30 | 1.02 (0.97, 1.07)   | 0.52  | 1.00 (0.97, 1.04)   | 0.82    |
| BP-3      | 0.25 (0.13, 0.47)   | <.0001 | 0.36 (0.19, 0.69)   | 0.002   | 2.69 (1.45, 4.98)   | 0.002  | 1.20 (0.76, 1.90)   | 0.43 | 1.01 (0.98, 1.05)   | 0.51  | 1.08 (1.04, 1.11)   | <.0001  |
| BPA       | 1.53 (1.12, 2.09)   | 0.01   | 1.19 (0.85, 1.65)   | 0.31    | 0.72 (0.54, 0.97)   | 0.03   | 0.75 (0.59, 0.96)   | 0.02 | 1.02 (0.99, 1.05)   | 0.22  | 1.03 (1.01, 1.04)   | 0.0003  |
| BPS       | 2.53 (1.42, 4.49)   | 0.002  | 2.83 (1.61, 4.98)   | 0.0003  | 0.91 (0.56, 1.46)   | 0.68   | 0.84 (0.58, 1.22)   | 0.11 | 0.99 (0.96, 1.02)   | 0.57  | 1.01 (0.99, 1.04)   | 0.38    |
| E-PB      | 3.59 (1.59, 8.13)   | 0.01   | 0.42 (0.16, 1.14)   | 0.09    | 1.08 (0.49, 2.35)   | 0.86   | 0.93 (0.45, 1.91)   | 0.26 | 0.97 (0.93, 1.01)   | 0.17  | 1.06 (1.00, 1.12)   | 0.03    |
| M-PB      | 5.87 (2.44, 14.13)  | <.0001 | 2.01 (0.69, 5.83)   | 0.20    | 1.13 (0.52, 2.48)   | 0.75   | 0.93 (0.54, 1.60)   | 0.80 | 0.98 (0.93, 1.02)   | 0.34  | 1.06 (1.02, 1.10)   | 0.002   |
| P-PB      | 4.21 (1.79, 9.91)   | 0.001  | 1.63 (0.63, 4.23)   | 0.32    | 1.09 (0.51, 2.35)   | 0.82   | 0.91 (0.55, 1.50)   | 0.71 | 0.99 (0.94, 1.03)   | 0.59  | 1.04 (1.00, 1.07)   | 0.03    |
| TCS       | 1.00 (0.54, 1.84)   | 0.99   | 0.55 (0.27, 1.12)   | 0.10    | 1.52 (0.86, 2.70)   | 0.15   | 0.98 (0.60, 1.60)   | 0.94 | 0.99 (0.96, 1.03)   | 0.59  | 0.99 (0.96, 1.02)   | 0.43    |
| MEP       | 1.98 (1.31, 3.01)   | 0.001  | 1.16 (0.71, 1.90)   | 0.55    | 0.37 (0.25, 0.55)   | <.0001 | 1.04 (0.80, 1.35)   | 0.78 | 1.00 (0.98, 1.03)   | 0.82  | 1.02 (1.01, 1.04)   | 0.01    |
| MBP       | 1.07 (0.74, 1.54)   | 0.73   | 0.83 (0.53, 1.29)   | 0.41    | 0.64 (0.45, 0.92)   | 0.02   | 0.94 (0.76, 1.16)   | 0.57 | 1.02 (1.00, 1.04)   | 0.02  | 1.00 (0.99, 1.02)   | 0.66    |
| MNP       | 1.65 (0.96, 2.83)   | 0.07   | 1.30 (0.64, 2.66)   | 0.47    | 0.62 (0.37, 1.06)   | 0.08   | 0.82 (0.55, 1.23)   | 0.35 | 1.03 (1.01, 1.05)   | 0.005 | 0.99 (0.96, 1.02)   | 0.39    |
| MHBP      | 1.46 (1.08, 1.98)   | 0.01   | 1.24 (0.87, 1.77)   | 0.24    | 0.86 (0.63, 1.19)   | 0.38   | 0.82 (0.66, 1.02)   | 0.07 | 1.00 (0.99, 1.02)   | 0.62  | 1.01 (1.00, 1.03)   | 0.15    |
| MHIBP     | 1.48 (1.10, 2.00)   | 0.01   | 1.17 (0.79, 1.74)   | 0.43    | 0.77 (0.56, 1.06)   | 0.11   | 0.85 (0.69, 1.06)   | 0.15 | 1.01 (0.99, 1.02)   | 0.58  | 1.01 (1.00, 1.03)   | 0.06    |
| MiBP      | 1.63 (0.81, 3.30)   | 0.17   | 0.73 (0.30, 1.81)   | 0.50    | 0.54 (0.27, 1.08)   | 0.08   | 1.03 (0.72, 1.46)   | 0.87 | 1.03 (0.99, 1.06)   | 0.14  | 0.99 (0.97, 1.02)   | 0.57    |
| MBzP      | 1.11 (0.75, 1.65)   | 0.60   | 1.01 (0.58, 1.78)   | 0.96    | 0.91 (0.60, 1.38)   | 0.67   | 0.97 (0.74, 1.27)   | 0.82 | 0.99 (0.97, 1.01)   | 0.36  | 0.99 (0.98, 1.01)   | 0.54    |
| MCPP      | 1.10 (0.74, 1.65)   | 0.62   | 0.97 (0.74, 1.28)   | 0.85    | 0.92 (0.61, 1.40)   | 0.71   | 0.97 (0.74, 1.28)   | 0.85 | 1.01 (0.98, 1.04)   | 0.56  | 0.99 (0.98, 1.01)   | 0.54    |
| MEHP      | 1.46 (1.08, 1.98)   | 0.01   | 1.24 (0.87, 1.77)   | 0.24    | 0.86 (0.63, 1.19)   | 0.38   | 0.82 (0.66, 1.02)   | 0.07 | 1.01 (0.99, 1.04)   | 0.21  | 1.01 (1.00, 1.03)   | 0.15    |
| MEOHP     | 1.30 (0.97, 1.75)   | 0.07   | 1.28 (0.92, 1.79)   | 0.15    | 0.97 (0.73, 1.29)   | 0.86   | 0.96 (0.75, 1.22)   | 0.73 | 1.02 (0.99, 1.04)   | 0.20  | 1.02 (1.00, 1.03)   | 0.02    |
| MEHHP     | 1.13 (0.89, 1.44)   | 0.30   | 1.36 (1.03, 1.78)   | 0.03    | 0.93 (0.74, 1.18)   | 0.55   | 0.99 (0.81, 1.23)   | 0.96 | 1.01 (0.99, 1.03)   | 0.27  | 1.01 (1.00, 1.02)   | 0.07    |
| MECPP     | 1.42 (0.95, 2.11)   | 0.09   | 1.53 (0.89, 2.62)   | 0.12    | 1.33 (0.87, 2.02)   | 0.19   | 0.98 (0.73, 1.31)   | 0.88 | 0.99 (0.96, 1.01)   | 0.36  | 0.99 (0.97, 1.01)   | 0.16    |
| MCOP      | 1.57 (1.14, 2.17)   | 0.01   | 1.17 (0.80, 1.70)   | 0.42    | 1.29 (0.94, 1.76)   | 0.12   | 1.16 (0.92, 1.48)   | 0.22 | 1.02 (1.00, 1.05)   | 0.05  | 0.99 (0.97, 1.00)   | 0.16    |
| MCNP      | 1.13 (0.74, 1.72)   | 0.58   | 0.74 (0.46, 1.21)   | 0.23    | 0.69 (0.44, 1.08)   | 0.10   | 0.92 (0.69, 1.23)   | 0.59 | 1.00 (0.97, 1.03)   | 0.94  | 1.01 (0.99, 1.02)   | 0.57    |
| MHINCH    | 1.11 (0.71, 1.72)   | 0.65   | 0.73 (0.44, 1.20)   | 0.22    | 0.69 (0.44, 1.08)   | 0.11   | 0.94 (0.70, 1.28)   | 0.71 | 0.99 (0.97, 1.02)   | 0.46  | 1.01 (0.99, 1.02)   | 0.60    |
| MCOCH     | 0.95 (0.61, 1.47)   | 0.81   | 0.79 (0.49, 1.27)   | 0.33    | 0.66 (0.43, 1.03)   | 0.07   | 0.97 (0.72, 1.31)   | 0.84 | 1.01 (0.99, 1.02)   | 0.25  | 1.01 (0.99, 1.03)   | 0.28    |
| PFDA      | 1.72 (0.95, 3.14)   | 0.08   | 3.76 (2.00, 7.04)   | <0.0001 | 0.91 (0.48, 1.7)    | 0.76   | 1.15 (0.75, 1.75)   | 0.51 | 1.01 (1.00, 1.03)   | 0.17  | 1.04 (1.02, 1.07)   | 0.0003  |
| PFHxS     | 0.73 (0.49, 1.08)   | 0.12   | 0.89 (0.60, 1.32)   | 0.57    | 1.30 (0.88, 1.92)   | 0.19   | 0.93 (0.71, 1.23)   | 0.61 | 1.00 (0.99, 1.02)   | 0.83  | 0.99 (0.98, 1.01)   | 0.60    |
| PFNA      | 0.91 (0.70, 1.18)   | 0.48   | 0.87 (0.66, 1.13)   | 0.30    | 1.12 (0.87, 1.45)   | 0.37   | 0.75 (0.62, 0.92)   | 0.01 | 1.00 (0.98, 1.02)   | 0.90  | 0.99 (0.98, 1.00)   | 0.06    |
| Sm-PFOS   | 0.74 (0.51, 1.08)   | 0.11   | 0.87 (0.59, 1.26)   | 0.45    | 1.35 (0.93, 1.94)   | 0.11   | 1.02 (0.80, 1.28)   | 0.90 | 1.01 (0.99, 1.02)   | 0.27  | 1.00 (0.98, 1.02)   | 0.99    |
| n-PFOS    | 0.71 (0.50, 1.01)   | 0.06   | 1.01 (0.61, 1.66)   | 0.97    | 1.05 (0.72, 1.55)   | 0.80   | 0.91 (0.70, 1.02)   | 0.51 | 1.01 (0.99, 1.02)   | 0.27  | 0.99 (0.97, 1.00)   | 0.16    |
| n-PFOA    | 0.73 (0.50, 1.06)   | 0.09   | 1.03 (0.62, 1.72)   | 0.90    | 1.00 (0.66, 1.53)   | 0.99   | 0.86 (0.62, 1.19)   | 0.37 | 1.00 (0.98, 1.02)   | 0.90  | 0.99 (0.98, 1.00)   | 0.13    |

Reference category for categorical variables: race and ethnicity=non-Hispanic white; education=less than college graduate; sex=female.

**Supplemental Table S3:** Spearman correlations between biomarkers. P<0.05 shaded and bolded.

|          | BCIPP        | BCIPHIPP     | BDCIPP      | DPHP         | ip-PPP       | tb-PPP       | 2,4-DCP     | 2,5-DCP      | BP-3         | BPA          | BPS          | E-PB         | M-PB        | P-PB        | TCS          |
|----------|--------------|--------------|-------------|--------------|--------------|--------------|-------------|--------------|--------------|--------------|--------------|--------------|-------------|-------------|--------------|
| BCIPP    | <b>1.00</b>  | 0.14         | <b>0.32</b> | 0.00         | -0.11        | <b>-0.17</b> | 0.03        | -0.04        | <b>0.20</b>  | -0.01        | -0.07        | <b>0.17</b>  | 0.07        | 0.07        | 0.13         |
| BCIPHIPP | 0.14         | <b>1.00</b>  | 0.02        | 0.12         | <b>0.27</b>  | 0.07         | 0.09        | <b>0.24</b>  | <b>-0.16</b> | 0.09         | 0.12         | 0.01         | -0.01       | -0.05       | -0.06        |
| BDCIPP   | <b>0.32</b>  | 0.02         | <b>1.00</b> | 0.14         | 0.06         | 0.01         | 0.09        | -0.01        | <b>0.23</b>  | <b>0.30</b>  | 0.03         | <b>0.23</b>  | <b>0.22</b> | <b>0.17</b> | 0.14         |
| DPHP     | 0.00         | 0.12         | 0.14        | <b>1.00</b>  | <b>0.29</b>  | <b>0.49</b>  | <b>0.16</b> | <b>0.17</b>  | -0.02        | <b>0.24</b>  | 0.06         | 0.11         | <b>0.15</b> | 0.11        | 0.08         |
| ip-PPP   | -0.11        | <b>0.27</b>  | 0.06        | <b>0.29</b>  | <b>1.00</b>  | <b>0.26</b>  | 0.01        | <b>0.24</b>  | -0.09        | <b>0.20</b>  | 0.04         | -0.04        | 0.03        | 0.00        | <b>-0.16</b> |
| tb-PPP   | <b>-0.17</b> | 0.07         | 0.01        | <b>0.49</b>  | <b>0.26</b>  | <b>1.00</b>  | <b>0.19</b> | <b>0.23</b>  | -0.06        | <b>0.22</b>  | <b>0.15</b>  | -0.04        | 0.08        | 0.09        | -0.01        |
| 2,4-DCP  | 0.03         | 0.09         | 0.09        | <b>0.16</b>  | 0.01         | <b>0.19</b>  | <b>1.00</b> | <b>0.65</b>  | -0.12        | <b>0.23</b>  | <b>0.24</b>  | 0.07         | 0.11        | 0.05        | <b>0.19</b>  |
| 2,5-DCP  | -0.04        | <b>0.24</b>  | -0.01       | <b>0.17</b>  | <b>0.24</b>  | <b>0.23</b>  | <b>0.65</b> | <b>1.00</b>  | <b>-0.43</b> | <b>0.28</b>  | <b>0.26</b>  | 0.01         | <b>0.15</b> | <b>0.15</b> | <b>-0.20</b> |
| BP-3     | <b>0.20</b>  | <b>-0.16</b> | <b>0.23</b> | -0.02        | -0.09        | -0.06        | -0.12       | <b>-0.43</b> | <b>1.00</b>  | -0.09        | <b>-0.20</b> | 0.14         | -0.07       | -0.07       | <b>0.15</b>  |
| BPA      | -0.01        | 0.09         | <b>0.30</b> | <b>0.24</b>  | <b>0.20</b>  | <b>0.22</b>  | <b>0.23</b> | <b>0.28</b>  | -0.09        | <b>1.00</b>  | <b>0.27</b>  | <b>0.23</b>  | <b>0.29</b> | <b>0.26</b> | 0.01         |
| BPS      | -0.07        | 0.12         | 0.03        | 0.06         | 0.04         | <b>0.15</b>  | <b>0.24</b> | <b>0.26</b>  | <b>-0.20</b> | <b>0.27</b>  | <b>1.00</b>  | -0.10        | 0.10        | 0.13        | -0.06        |
| E-PB     | <b>0.17</b>  | 0.01         | <b>0.23</b> | 0.11         | -0.04        | -0.04        | 0.07        | 0.01         | 0.14         | <b>0.23</b>  | -0.10        | <b>1.00</b>  | <b>0.54</b> | <b>0.42</b> | 0.03         |
| M-PB     | 0.07         | -0.01        | <b>0.22</b> | <b>0.15</b>  | 0.03         | 0.08         | 0.11        | <b>0.15</b>  | -0.07        | <b>0.29</b>  | 0.10         | <b>0.54</b>  | <b>1.00</b> | <b>0.81</b> | 0.05         |
| P-PB     | 0.07         | -0.05        | <b>0.17</b> | 0.11         | 0.00         | 0.09         | 0.05        | <b>0.15</b>  | -0.07        | <b>0.26</b>  | 0.13         | <b>0.42</b>  | <b>0.81</b> | <b>1.00</b> | -0.08        |
| TCS      | 0.13         | -0.06        | 0.14        | 0.08         | <b>-0.16</b> | -0.01        | <b>0.19</b> | <b>-0.20</b> | <b>0.15</b>  | 0.01         | -0.06        | 0.03         | 0.05        | -0.08       | <b>1.00</b>  |
| MEP      | -0.05        | <b>0.25</b>  | <b>0.19</b> | <b>0.23</b>  | <b>0.16</b>  | <b>0.24</b>  | <b>0.32</b> | <b>0.53</b>  | <b>-0.26</b> | <b>0.41</b>  | <b>0.29</b>  | <b>0.29</b>  | <b>0.38</b> | <b>0.34</b> | -0.06        |
| MBP      | 0.02         | 0.09         | <b>0.23</b> | <b>0.31</b>  | 0.06         | <b>0.23</b>  | <b>0.29</b> | <b>0.37</b>  | -0.14        | <b>0.30</b>  | <b>0.22</b>  | <b>0.21</b>  | <b>0.22</b> | <b>0.30</b> | -0.09        |
| MNP      | 0.12         | -0.09        | <b>0.17</b> | -0.04        | <b>-0.17</b> | 0.03         | 0.08        | -0.01        | 0.01         | 0.14         | 0.08         | -0.01        | 0.01        | 0.05        | 0.04         |
| MHBP     | -0.09        | 0.05         | 0.07        | <b>0.26</b>  | -0.04        | <b>0.18</b>  | <b>0.19</b> | <b>0.34</b>  | <b>-0.15</b> | <b>0.26</b>  | <b>0.20</b>  | 0.09         | 0.14        | <b>0.20</b> | -0.12        |
| MHIBP    | 0.12         | 0.05         | <b>0.17</b> | <b>0.28</b>  | 0.13         | 0.10         | 0.15        | <b>0.27</b>  | -0.08        | <b>0.34</b>  | <b>0.21</b>  | <b>0.17</b>  | <b>0.25</b> | <b>0.24</b> | -0.12        |
| MiBP     | 0.12         | 0.13         | <b>0.17</b> | <b>0.31</b>  | <b>0.18</b>  | <b>0.18</b>  | <b>0.23</b> | <b>0.35</b>  | -0.13        | <b>0.34</b>  | <b>0.21</b>  | <b>0.17</b>  | <b>0.25</b> | <b>0.26</b> | -0.10        |
| MBzP     | 0.03         | 0.10         | <b>0.22</b> | <b>0.33</b>  | 0.05         | <b>0.16</b>  | <b>0.18</b> | <b>0.31</b>  | <b>-0.15</b> | <b>0.35</b>  | <b>0.21</b>  | <b>0.16</b>  | <b>0.16</b> | <b>0.22</b> | -0.09        |
| MCPP     | 0.11         | -0.05        | <b>0.23</b> | 0.08         | -0.06        | <b>0.17</b>  | <b>0.18</b> | 0.09         | 0.06         | <b>0.35</b>  | <b>0.27</b>  | 0.05         | 0.10        | <b>0.15</b> | 0.05         |
| MEHP     | 0.03         | <b>-0.18</b> | 0.06        | <b>0.26</b>  | -0.10        | <b>0.28</b>  | 0.15        | 0.08         | -0.06        | <b>0.22</b>  | <b>0.25</b>  | 0.01         | 0.11        | <b>0.21</b> | 0.04         |
| MEOHP    | 0.07         | <b>-0.15</b> | <b>0.27</b> | <b>0.31</b>  | 0.02         | <b>0.24</b>  | <b>0.28</b> | <b>0.21</b>  | 0.03         | <b>0.37</b>  | <b>0.34</b>  | 0.07         | <b>0.17</b> | <b>0.26</b> | 0.01         |
| MEHHP    | 0.04         | -0.14        | <b>0.23</b> | <b>0.32</b>  | 0.01         | <b>0.27</b>  | <b>0.26</b> | <b>0.23</b>  | -0.05        | <b>0.37</b>  | <b>0.35</b>  | 0.06         | <b>0.18</b> | <b>0.27</b> | -0.03        |
| MECPP    | -0.01        | <b>-0.17</b> | <b>0.22</b> | <b>0.28</b>  | 0.07         | <b>0.22</b>  | <b>0.28</b> | <b>0.22</b>  | 0.01         | <b>0.38</b>  | <b>0.36</b>  | 0.01         | <b>0.15</b> | <b>0.18</b> | 0.03         |
| MCOP     | 0.11         | <b>-0.15</b> | <b>0.26</b> | -0.04        | -0.06        | 0.08         | 0.13        | 0.02         | 0.07         | <b>0.24</b>  | <b>0.20</b>  | -0.01        | 0.03        | 0.07        | 0.11         |
| MCNP     | 0.11         | -0.03        | <b>0.21</b> | 0.12         | 0.07         | <b>0.17</b>  | <b>0.19</b> | 0.14         | 0.00         | <b>0.32</b>  | <b>0.28</b>  | 0.08         | 0.10        | 0.14        | 0.14         |
| MHINCH   | 0.03         | 0.08         | <b>0.29</b> | <b>0.18</b>  | 0.04         | <b>0.18</b>  | <b>0.19</b> | <b>0.19</b>  | -0.02        | <b>0.39</b>  | 0.12         | <b>0.18</b>  | 0.12        | 0.08        | 0.00         |
| MCOCH    | 0.02         | 0.09         | <b>0.26</b> | 0.14         | 0.05         | 0.13         | 0.11        | 0.11         | 0.03         | <b>0.34</b>  | 0.10         | 0.13         | 0.06        | 0.00        | 0.03         |
| PFDA     | <b>-0.34</b> | <b>0.24</b>  | 0.12        | 0.16         | <b>0.27</b>  | <b>0.33</b>  | <b>0.25</b> | <b>0.30</b>  | 0.01         | 0.15         | 0.18         | 0.08         | 0.17        | 0.11        | -0.12        |
| PFHxS    | -0.17        | -0.17        | 0.00        | -0.17        | -0.05        | -0.12        | -0.09       | <b>-0.26</b> | 0.10         | -0.11        | -0.08        | -0.14        | -0.05       | -0.10       | 0.02         |
| PFNA     | -0.20        | -0.11        | -0.06       | 0.07         | -0.03        | 0.17         | -0.10       | -0.14        | 0.01         | 0.17         | 0.16         | <b>-0.30</b> | -0.21       | -0.13       | -0.14        |
| Sm-PFOS  | -0.09        | <b>-0.28</b> | 0.03        | <b>-0.24</b> | -0.13        | -0.20        | -0.13       | <b>-0.26</b> | 0.16         | <b>-0.28</b> | -0.05        | -0.18        | -0.09       | -0.11       | -0.01        |
| n-PFOS   | <b>-0.22</b> | -0.22        | -0.08       | <b>-0.26</b> | -0.13        | -0.16        | -0.16       | <b>-0.26</b> | 0.03         | -0.20        | 0.05         | <b>-0.29</b> | -0.14       | -0.16       | -0.01        |
| n-PFOA   | <b>-0.26</b> | -0.15        | -0.06       | -0.22        | -0.16        | -0.10        | -0.05       | <b>-0.26</b> | 0.15         | -0.15        | -0.04        | -0.22        | -0.17       | -0.20       | -0.07        |

**Supplemental Table S3 (continued):** Spearman correlations between biomarkers. P<0.05 shaded and bolded.

|          | MEP          | MBP          | MNP          | MHBP         | MHIBP        | MiBP         | MBzP         | MCPP        | MEHP         | MEOHP        | MEHHP       | MECPP        | MCOP         | MCNP        | MHINCH      |
|----------|--------------|--------------|--------------|--------------|--------------|--------------|--------------|-------------|--------------|--------------|-------------|--------------|--------------|-------------|-------------|
| BCIPP    | -0.05        | 0.02         | 0.12         | -0.09        | 0.12         | 0.12         | 0.03         | 0.11        | 0.03         | 0.07         | 0.04        | -0.01        | 0.11         | 0.11        | 0.03        |
| BCIPHIPP | <b>0.25</b>  | 0.09         | -0.09        | 0.05         | 0.05         | 0.13         | 0.10         | -0.05       | <b>-0.18</b> | <b>-0.15</b> | -0.14       | <b>-0.17</b> | <b>-0.15</b> | -0.03       | 0.08        |
| BDCIPP   | <b>0.19</b>  | <b>0.23</b>  | <b>0.17</b>  | 0.07         | <b>0.17</b>  | <b>0.17</b>  | <b>0.22</b>  | <b>0.23</b> | 0.06         | <b>0.27</b>  | <b>0.23</b> | <b>0.22</b>  | <b>0.26</b>  | <b>0.21</b> | <b>0.29</b> |
| DPHP     | <b>0.23</b>  | <b>0.31</b>  | -0.04        | <b>0.26</b>  | <b>0.28</b>  | <b>0.31</b>  | <b>0.33</b>  | 0.08        | <b>0.26</b>  | <b>0.31</b>  | <b>0.32</b> | <b>0.28</b>  | -0.04        | 0.12        | <b>0.18</b> |
| ip-PPP   | <b>0.16</b>  | 0.06         | <b>-0.17</b> | -0.04        | 0.13         | <b>0.18</b>  | 0.05         | -0.06       | -0.10        | 0.02         | 0.01        | 0.07         | -0.06        | 0.07        | 0.04        |
| tb-PPP   | <b>0.24</b>  | <b>0.23</b>  | 0.03         | <b>0.18</b>  | 0.10         | <b>0.18</b>  | <b>0.16</b>  | <b>0.17</b> | <b>0.28</b>  | <b>0.24</b>  | <b>0.27</b> | <b>0.22</b>  | 0.08         | <b>0.17</b> | <b>0.18</b> |
| 2,4-DCP  | <b>0.32</b>  | <b>0.29</b>  | 0.08         | <b>0.19</b>  | 0.15         | <b>0.23</b>  | <b>0.18</b>  | <b>0.18</b> | 0.15         | <b>0.28</b>  | <b>0.26</b> | <b>0.28</b>  | 0.13         | <b>0.19</b> | <b>0.19</b> |
| 2,5-DCP  | <b>0.53</b>  | <b>0.37</b>  | -0.01        | <b>0.34</b>  | <b>0.27</b>  | <b>0.35</b>  | <b>0.31</b>  | 0.09        | 0.08         | <b>0.21</b>  | <b>0.23</b> | <b>0.22</b>  | 0.02         | 0.14        | <b>0.19</b> |
| BP-3     | <b>-0.26</b> | -0.14        | 0.01         | <b>-0.15</b> | -0.08        | -0.13        | <b>-0.15</b> | 0.06        | -0.06        | 0.03         | -0.05       | 0.01         | 0.07         | 0.00        | -0.02       |
| BPA      | <b>0.41</b>  | <b>0.30</b>  | 0.14         | <b>0.26</b>  | <b>0.34</b>  | <b>0.34</b>  | <b>0.35</b>  | <b>0.35</b> | <b>0.22</b>  | <b>0.37</b>  | <b>0.37</b> | <b>0.38</b>  | <b>0.24</b>  | <b>0.32</b> | <b>0.39</b> |
| BPS      | <b>0.29</b>  | <b>0.22</b>  | 0.08         | <b>0.20</b>  | <b>0.21</b>  | <b>0.21</b>  | <b>0.21</b>  | <b>0.27</b> | <b>0.25</b>  | <b>0.34</b>  | <b>0.35</b> | <b>0.36</b>  | <b>0.20</b>  | <b>0.28</b> | 0.12        |
| E-PB     | <b>0.29</b>  | <b>0.21</b>  | -0.01        | 0.09         | <b>0.17</b>  | <b>0.17</b>  | <b>0.16</b>  | 0.05        | 0.01         | 0.07         | 0.06        | 0.01         | -0.01        | 0.08        | <b>0.18</b> |
| M-PB     | <b>0.38</b>  | <b>0.22</b>  | 0.01         | 0.14         | <b>0.25</b>  | <b>0.25</b>  | <b>0.16</b>  | 0.10        | 0.11         | <b>0.17</b>  | <b>0.18</b> | <b>0.15</b>  | 0.03         | 0.10        | 0.12        |
| P-PB     | <b>0.34</b>  | <b>0.30</b>  | 0.05         | <b>0.20</b>  | <b>0.24</b>  | <b>0.26</b>  | <b>0.22</b>  | <b>0.15</b> | <b>0.21</b>  | <b>0.26</b>  | <b>0.27</b> | <b>0.18</b>  | 0.07         | 0.14        | 0.08        |
| TCS      | -0.06        | -0.09        | 0.04         | -0.12        | -0.12        | -0.10        | -0.09        | 0.05        | 0.04         | 0.01         | -0.03       | 0.03         | 0.11         | 0.14        | 0.00        |
| MEP      | <b>1.00</b>  | <b>0.53</b>  | -0.07        | <b>0.44</b>  | <b>0.41</b>  | <b>0.49</b>  | <b>0.46</b>  | <b>0.16</b> | <b>0.15</b>  | <b>0.30</b>  | <b>0.32</b> | <b>0.30</b>  | 0.00         | <b>0.18</b> | <b>0.22</b> |
| MBP      | <b>0.53</b>  | <b>1.00</b>  | 0.05         | <b>0.79</b>  | <b>0.51</b>  | <b>0.62</b>  | <b>0.76</b>  | <b>0.32</b> | <b>0.30</b>  | <b>0.51</b>  | <b>0.52</b> | <b>0.41</b>  | 0.14         | <b>0.28</b> | <b>0.26</b> |
| MNP      | -0.07        | 0.05         | <b>1.00</b>  | 0.03         | 0.10         | 0.08         | 0.10         | <b>0.60</b> | <b>0.44</b>  | <b>0.28</b>  | <b>0.27</b> | <b>0.30</b>  | <b>0.74</b>  | <b>0.40</b> | 0.07        |
| MHBP     | <b>0.44</b>  | <b>0.79</b>  | 0.03         | <b>1.00</b>  | <b>0.58</b>  | <b>0.57</b>  | <b>0.65</b>  | <b>0.28</b> | <b>0.26</b>  | <b>0.39</b>  | <b>0.43</b> | <b>0.38</b>  | 0.11         | <b>0.25</b> | <b>0.19</b> |
| MHIBP    | <b>0.41</b>  | <b>0.51</b>  | 0.10         | <b>0.58</b>  | <b>1.00</b>  | <b>0.89</b>  | <b>0.40</b>  | <b>0.35</b> | <b>0.21</b>  | <b>0.37</b>  | <b>0.39</b> | <b>0.39</b>  | <b>0.21</b>  | <b>0.31</b> | <b>0.24</b> |
| MiBP     | <b>0.49</b>  | <b>0.62</b>  | 0.08         | <b>0.57</b>  | <b>0.89</b>  | <b>1.00</b>  | <b>0.44</b>  | <b>0.31</b> | <b>0.28</b>  | <b>0.43</b>  | <b>0.45</b> | <b>0.39</b>  | <b>0.16</b>  | <b>0.29</b> | <b>0.27</b> |
| MBzP     | <b>0.46</b>  | <b>0.76</b>  | 0.10         | <b>0.65</b>  | <b>0.40</b>  | <b>0.44</b>  | <b>1.00</b>  | <b>0.28</b> | <b>0.32</b>  | <b>0.42</b>  | <b>0.45</b> | <b>0.32</b>  | <b>0.16</b>  | <b>0.26</b> | <b>0.31</b> |
| MCPP     | <b>0.16</b>  | <b>0.32</b>  | <b>0.60</b>  | <b>0.28</b>  | <b>0.35</b>  | <b>0.31</b>  | <b>0.28</b>  | <b>1.00</b> | <b>0.36</b>  | <b>0.49</b>  | <b>0.48</b> | <b>0.56</b>  | <b>0.77</b>  | <b>0.61</b> | <b>0.20</b> |
| MEHP     | <b>0.15</b>  | <b>0.30</b>  | <b>0.44</b>  | <b>0.26</b>  | <b>0.21</b>  | <b>0.28</b>  | <b>0.32</b>  | <b>0.36</b> | <b>1.00</b>  | <b>0.68</b>  | <b>0.71</b> | <b>0.61</b>  | <b>0.31</b>  | <b>0.29</b> | 0.08        |
| MEOHP    | <b>0.30</b>  | <b>0.51</b>  | <b>0.28</b>  | <b>0.39</b>  | <b>0.37</b>  | <b>0.43</b>  | <b>0.42</b>  | <b>0.49</b> | <b>0.68</b>  | <b>1.00</b>  | <b>0.98</b> | <b>0.90</b>  | <b>0.30</b>  | <b>0.36</b> | <b>0.20</b> |
| MEHHP    | <b>0.32</b>  | <b>0.52</b>  | <b>0.27</b>  | <b>0.43</b>  | <b>0.39</b>  | <b>0.45</b>  | <b>0.45</b>  | <b>0.48</b> | <b>0.71</b>  | <b>0.98</b>  | <b>1.00</b> | <b>0.90</b>  | <b>0.31</b>  | <b>0.37</b> | <b>0.19</b> |
| MECPP    | <b>0.30</b>  | <b>0.41</b>  | <b>0.30</b>  | <b>0.38</b>  | <b>0.39</b>  | <b>0.39</b>  | <b>0.32</b>  | <b>0.56</b> | <b>0.61</b>  | <b>0.90</b>  | <b>0.90</b> | <b>1.00</b>  | <b>0.41</b>  | <b>0.45</b> | <b>0.23</b> |
| MCOP     | 0.00         | 0.14         | <b>0.74</b>  | 0.11         | <b>0.21</b>  | <b>0.16</b>  | <b>0.16</b>  | <b>0.77</b> | <b>0.31</b>  | <b>0.30</b>  | <b>0.31</b> | <b>0.41</b>  | <b>1.00</b>  | <b>0.61</b> | <b>0.15</b> |
| MCNP     | <b>0.18</b>  | <b>0.28</b>  | <b>0.40</b>  | <b>0.25</b>  | <b>0.31</b>  | <b>0.29</b>  | <b>0.26</b>  | <b>0.61</b> | <b>0.29</b>  | <b>0.36</b>  | <b>0.37</b> | <b>0.45</b>  | <b>0.61</b>  | <b>1.00</b> | <b>0.27</b> |
| MHINCH   | <b>0.22</b>  | <b>0.26</b>  | 0.07         | <b>0.19</b>  | <b>0.24</b>  | <b>0.27</b>  | <b>0.31</b>  | <b>0.20</b> | 0.08         | <b>0.20</b>  | <b>0.19</b> | <b>0.23</b>  | <b>0.15</b>  | <b>0.27</b> | <b>1.00</b> |
| MCOCH    | <b>0.15</b>  | <b>0.16</b>  | 0.07         | 0.13         | <b>0.23</b>  | <b>0.21</b>  | <b>0.21</b>  | <b>0.17</b> | 0.01         | 0.13         | 0.11        | <b>0.20</b>  | 0.13         | <b>0.25</b> | <b>0.93</b> |
| PFDA     | <b>0.34</b>  | 0.07         | -0.19        | 0.13         | 0.02         | 0.05         | 0.01         | -0.01       | -0.03        | 0.06         | 0.06        | 0.08         | -0.20        | -0.02       | 0.10        |
| PFHxS    | <b>-0.36</b> | <b>-0.23</b> | 0.15         | -0.21        | -0.10        | <b>-0.22</b> | <b>-0.25</b> | -0.06       | -0.05        | -0.06        | -0.05       | -0.03        | 0.11         | -0.08       | -0.17       |
| PFNA     | -0.22        | -0.07        | <b>0.34</b>  | 0.02         | 0.00         | -0.06        | -0.01        | <b>0.25</b> | 0.20         | 0.11         | 0.13        | 0.09         | <b>0.22</b>  | 0.02        | 0.09        |
| Sm-PFOS  | <b>-0.31</b> | <b>-0.25</b> | 0.04         | -0.18        | -0.10        | <b>-0.23</b> | -0.21        | -0.17       | -0.05        | -0.07        | -0.08       | -0.05        | 0.04         | -0.14       | -0.18       |
| n-PFOS   | <b>-0.25</b> | <b>-0.24</b> | 0.00         | -0.15        | -0.14        | <b>-0.25</b> | -0.20        | -0.12       | -0.01        | -0.10        | -0.10       | -0.07        | -0.03        | -0.19       | -0.15       |
| n-PFOA   | <b>-0.35</b> | <b>-0.29</b> | -0.01        | -0.18        | <b>-0.25</b> | <b>-0.33</b> | <b>-0.33</b> | -0.06       | -0.10        | -0.05        | -0.07       | -0.02        | -0.01        | -0.21       | -0.10       |

**Supplemental Table S3 (continued):** Spearman correlations between biomarkers. P<0.05 shaded and bolded.

|          | MCOCH       | PFDeA        | PFHxS        | PFNA2        | Sm-PFOS      | n-PFOS       | n-PFOA       |
|----------|-------------|--------------|--------------|--------------|--------------|--------------|--------------|
| BCIPP    | 0.02        | <b>-0.34</b> | -0.17        | -0.20        | -0.09        | <b>-0.22</b> | <b>-0.26</b> |
| BCIPHIPP | 0.09        | <b>0.24</b>  | -0.17        | -0.11        | <b>-0.28</b> | -0.22        | -0.15        |
| BDCIPP   | <b>0.26</b> | 0.12         | 0.00         | -0.06        | 0.03         | -0.08        | -0.06        |
| DPHP     | 0.14        | 0.16         | -0.17        | 0.07         | <b>-0.24</b> | -0.26        | -0.22        |
| ip-PPP   | 0.05        | <b>0.27</b>  | -0.05        | -0.03        | -0.13        | -0.13        | -0.16        |
| tb-PPP   | 0.13        | <b>0.33</b>  | -0.12        | 0.17         | -0.20        | -0.16        | -0.10        |
| 2,4-DCP  | 0.11        | <b>0.25</b>  | -0.09        | -0.10        | -0.13        | -0.16        | -0.05        |
| 2,5-DCP  | 0.11        | <b>0.30</b>  | <b>-0.26</b> | -0.14        | <b>-0.26</b> | <b>-0.26</b> | <b>-0.26</b> |
| BP-3     | 0.03        | 0.01         | 0.10         | 0.01         | 0.16         | 0.03         | 0.15         |
| BPA      | <b>0.34</b> | 0.15         | -0.11        | 0.17         | <b>-0.28</b> | -0.20        | -0.15        |
| BPS      | 0.10        | 0.18         | -0.08        | 0.16         | -0.05        | 0.05         | -0.04        |
| E-PB     | 0.13        | 0.08         | -0.14        | <b>-0.30</b> | -0.18        | <b>-0.29</b> | -0.22        |
| M-PB     | 0.06        | 0.17         | -0.05        | -0.21        | -0.09        | -0.14        | -0.17        |
| P-PB     | 0.00        | 0.11         | -0.10        | -0.13        | -0.11        | -0.16        | -0.20        |
| TCS      | 0.03        | -0.12        | 0.02         | -0.14        | -0.01        | -0.01        | -0.07        |
| MEP      | <b>0.15</b> | <b>0.34</b>  | <b>-0.36</b> | -0.22        | <b>-0.31</b> | <b>-0.25</b> | <b>-0.35</b> |
| MBP      | <b>0.16</b> | 0.07         | <b>-0.23</b> | -0.07        | <b>-0.25</b> | <b>-0.24</b> | <b>-0.29</b> |
| MNP      | 0.07        | -0.19        | 0.15         | <b>0.34</b>  | 0.04         | 0.00         | -0.01        |
| MHBP     | 0.13        | 0.13         | -0.21        | 0.02         | -0.18        | -0.15        | -0.18        |
| MHIBP    | <b>0.23</b> | 0.02         | -0.10        | 0.00         | -0.10        | -0.14        | <b>-0.25</b> |
| MiBP     | <b>0.21</b> | 0.05         | <b>-0.22</b> | -0.06        | <b>-0.23</b> | <b>-0.25</b> | <b>-0.33</b> |
| MBzP     | <b>0.21</b> | 0.01         | <b>-0.25</b> | -0.01        | -0.21        | -0.20        | <b>-0.33</b> |
| MCPP     | <b>0.17</b> | -0.01        | -0.06        | <b>0.25</b>  | -0.17        | -0.12        | -0.06        |
| MEHP     | 0.01        | -0.03        | -0.05        | 0.20         | -0.05        | -0.01        | -0.10        |
| MEOHP    | 0.13        | 0.06         | -0.06        | 0.11         | -0.07        | -0.10        | -0.05        |
| MEHHP    | 0.11        | 0.06         | -0.05        | 0.13         | -0.08        | -0.10        | -0.07        |
| MECPP    | <b>0.20</b> | 0.08         | -0.03        | 0.09         | -0.05        | -0.07        | -0.02        |
| MCOP     | 0.13        | -0.20        | 0.11         | <b>0.22</b>  | 0.04         | -0.03        | -0.01        |
| MCNP     | <b>0.25</b> | -0.02        | -0.08        | 0.02         | -0.14        | -0.19        | -0.21        |
| MHINCH   | <b>0.93</b> | 0.10         | -0.17        | 0.09         | -0.18        | -0.15        | -0.10        |
| MCOCH    | <b>1.00</b> | 0.10         | -0.15        | 0.05         | -0.13        | -0.13        | -0.10        |
| PFDA     | 0.10        | <b>1.00</b>  | -0.12        | 0.08         | -0.13        | -0.04        | 0.08         |
| PFHxS    | -0.15       | -0.12        | <b>1.00</b>  | <b>0.37</b>  | <b>0.77</b>  | <b>0.69</b>  | <b>0.65</b>  |
| PFNA     | 0.05        | 0.08         | <b>0.37</b>  | <b>1.00</b>  | <b>0.32</b>  | <b>0.42</b>  | <b>0.52</b>  |
| Sm-PFOS  | -0.13       | -0.13        | <b>0.77</b>  | <b>0.32</b>  | <b>1.00</b>  | <b>0.85</b>  | <b>0.70</b>  |
| n-PFOS   | -0.13       | -0.04        | <b>0.69</b>  | <b>0.42</b>  | <b>0.85</b>  | <b>1.00</b>  | <b>0.70</b>  |
| n-PFOA   | -0.10       | 0.08         | <b>0.65</b>  | <b>0.52</b>  | <b>0.70</b>  | <b>0.70</b>  | <b>1.00</b>  |
